# Supplementary material for: Social Determinants of Health Amplify the Association Between Ethnicity and COVID19: A Retrospective-Cohort study
Source: PubMed Central journal article supplement (PMC8699061), 2021-10-27
Supplement: NIHMS1754063-supplement-1.pdf [file NIHMS1754063-supplement-1.pdf]

**Supplemental Table 3:** Association Between Race and COVID-19 Status Stratified by SDOH Risk Factor

| At least one SDOH Risk Factor        |                   |              |
|--------------------------------------|-------------------|--------------|
| Breslow Day Test p-value: 0.9075     |                   |              |
|                                      | COVID Test Result |              |
| Race                                 | Positive          | Negative     |
| Black                                | 48 (30.77%)       | 63 (31.66%)  |
| White                                | 108 (69.23%)      | 136 (68.34%) |
| Odds ratio (95%CI): 0.96 (0.61,1.51) |                   |              |

  

| No SDOH Risk Factors                 |                   |              |
|--------------------------------------|-------------------|--------------|
|                                      | COVID Test Result |              |
| Race                                 | Positive          | Negative     |
| Black                                | 150 (30.93%)      | 181 (32.50%) |
| White                                | 335 (69.07%)      | 376 (67.50%) |
| Odds ratio (95%CI): 0.93 (0.72,1.21) |                   |              |

**Supplemental Table 4:** Evaluating the Association Between Age and Ethnicity to Evaluate Age as a Potential Confounder

| Age      | Ethnicity    |              | p-value |
|----------|--------------|--------------|---------|
|          | Hispanic     | Non-Hispanic |         |
| Under 18 | 76 (5.39%)   | 16 (3.09%)   | <0.0001 |
| 18-44    | 803 (56.91%) | 246 (47.58%) |         |
| 45-64    | 448 (31.75%) | 199 (38.49%) |         |
| 65+      | 84 (5.95%)   | 56 (10.83%)  |         |

**Supplementary Materials:** Social Determinants of Health Questionnaire

ENGLISH

Name \_\_\_\_\_

DOB \_\_\_\_\_

Medical Record # \_\_\_\_\_

## STAFF ONLY

Completed:

- In-person     By mail  
 By phone     By Email  
 Other

**Directions:** Please fill out all the questions, whether you are answering for yourself or for a child, so that your care team has the most complete information to care for you.

1. Today's Date: \_\_\_\_/\_\_\_\_/\_\_\_\_

2. What is your housing situation today?

- I do not have housing (staying with others, in a hotel, in a shelter, living outside on the street, on a beach, in a car, or in a park)  
 I have housing today, but I am worried about losing housing in the future  
 I have housing  
 I am not sure

3. Think about the place you live. Do you have problems with any of the following? (Check all that apply)

- Pests such as bugs, ants, or mice  
 Mold  
 Lead paint or pipes  
 Inadequate heat  
 Oven or stove not working  
 No or not working smoke detectors  
 Water leaks  
 None of the above  
 I am not sure

4. Within the past 12 months, you worried that your food would run out before you got money to buy more.

- Often true  
 Sometimes true  
 Never true

5. Within the past 12 months, the food you bought just didn't last and you didn't have enough money to get more.

- Often true  
 Sometimes true  
 Never true

6. In the past 12 months, has lack of transportation kept you from medical appointments, meetings, work or from getting things needed for daily living? (Check all that apply)

- Yes, it has kept me from medical appointments or getting medications  
 Yes, it has kept me from non-medical meetings, appointments, work, or getting things that I need  
 No  
 I am not sure

7. In the past 12 months has the electric, gas, oil, or water company threatened to shut off services in your home?

- Yes  
 No  
 Already shut off  
 I am not sure

8. Do you want help finding or keeping work or a job?

- Yes, help finding work  
 Yes, help keeping work  
 I do not need or want help  
 I am not sure

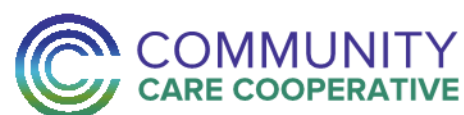

English 06/19
